# Supplementary material for: Growth‐ and stress‐related defects associated with wall hypoacetylation are strigolactone‐dependent
Source: PubMed Central journal article supplement (PMC6508513; doi:10.1002/pld3.62), 2018-06-13

A

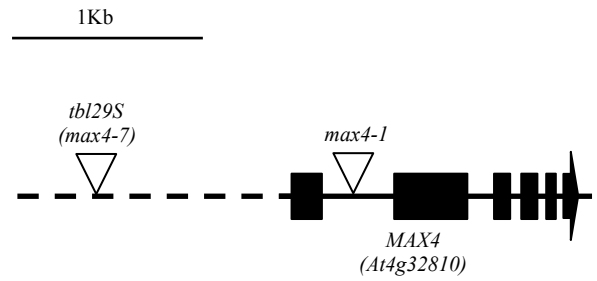

**Supp. Figure 1.** *tbl29S* mutation represents an insertion into the At4g32810 promoter region.

(A) Genomic model of *MAX4* (At4g32810). Black boxes indicate coding exons. Open triangles mark the positions of the *max4-1* (CS9568 stock number) and *max4-7* (*tbl29S*) insertions.

(B) *MAX4* gene expression in Col-0, *tbl29* and *tbl29*-suppressed plants. Data are represented as mean (AVG)  $\pm$  the standard deviation (SD) of 3 biological replicates. Means with different letters are significantly different (Tukey's HSD,  $p < 0.05$ )

B

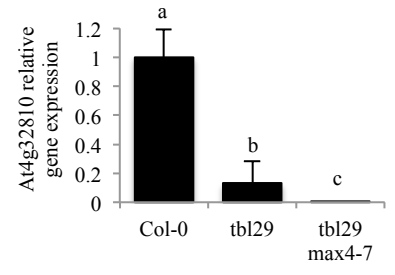

Supplement: PLD3-2-e00062-s001.pdf [file PLD3-2-e00062-s001.pdf]
