# Supplementary material for: Growth‐ and stress‐related defects associated with wall hypoacetylation are strigolactone‐dependent
Source: PubMed Central journal article supplement (PMC6508513; doi:10.1002/pld3.62), 2018-06-13
Supplement: PLD3-2-e00062-s002.pdf [file PLD3-2-e00062-s002.pdf]

**Supp. Figure 2.** Monosaccharide composition, cellulose and acetate content of stem cell walls. Data are represented as mean (AVG)  $\pm$  the standard deviation (SD) of biological replicates ( $\geq 5$ ). Means with different letters are significantly different (Tukey's HSD,  $p < 0.05$ ) in the significance (Sig) column.  
 Fuc=Fucose; Rha=Rhamnose; Ara=Arabinose; Gal=Galactose; Glc=Glucose; Xyl=Xylose; Man=Mannose; GalA; Galacturonic Acid; GlcA= Glucuronic Acid

|                              | Fuc             |    |     | Rha              |    |     | Ara             |    |     | Gal              |    |     | Glc              |    |     | Xyl               |    |     | Man              |    |     | GalA             |    |     | GlcA            |    |     | Cellulose          |    |     | Acetate          |  |   |
|------------------------------|-----------------|----|-----|------------------|----|-----|-----------------|----|-----|------------------|----|-----|------------------|----|-----|-------------------|----|-----|------------------|----|-----|------------------|----|-----|-----------------|----|-----|--------------------|----|-----|------------------|--|---|
|                              | AVG             | SD | Sig | AVG              | SD | Sig | AVG             | SD | Sig | AVG              | SD | Sig | AVG              | SD | Sig | AVG               | SD | Sig | AVG              | SD | Sig | AVG              | SD | Sig | AVG             | SD | Sig | AVG                | SD | Sig |                  |  |   |
| <b>Col-0</b>                 | 1.68 $\pm$ 0.29 |    | a   | 8.93 $\pm$ 1.56  |    | a   | 5.79 $\pm$ 0.60 |    | a   | 12.12 $\pm$ 0.97 |    | a   | 25.78 $\pm$ 3.68 |    | a   | 99.69 $\pm$ 4.58  |    | a   | 10.59 $\pm$ 1.34 |    | ab  | 28.98 $\pm$ 4.17 |    | a   | 3.77 $\pm$ 0.46 |    | ab  | 353.09 $\pm$ 7.50  |    | a   | 39.52 $\pm$ 3.38 |  | a |
| <i>tbl29</i>                 | 1.45 $\pm$ 0.03 |    | a   | 10.20 $\pm$ 0.38 |    | a   | 9.07 $\pm$ 1.28 |    | b   | 12.65 $\pm$ 0.56 |    | ab  | 26.84 $\pm$ 2.25 |    | a   | 128.62 $\pm$ 4.90 |    | b   | 13.44 $\pm$ 0.30 |    | b   | 30.15 $\pm$ 1.17 |    | a   | 5.24 $\pm$ 0.46 |    | b   | 310.08 $\pm$ 22.94 |    | b   | 23.14 $\pm$ 5.57 |  | b |
| <i>max4-7</i>                | 1.71 $\pm$ 0.18 |    | a   | 9.11 $\pm$ 0.81  |    | a   | 5.90 $\pm$ 0.58 |    | a   | 12.05 $\pm$ 0.72 |    | a   | 30.90 $\pm$ 1.52 |    | a   | 100.46 $\pm$ 0.35 |    | a   | 9.69 $\pm$ 0.24  |    | ab  | 28.42 $\pm$ 2.61 |    | a   | 3.76 $\pm$ 0.57 |    | a   | 361.33 $\pm$ 18.19 |    | a   | 34.64 $\pm$ 7.82 |  | a |
| <i>tbl29S (tbl29 max4-7)</i> | 1.80 $\pm$ 0.10 |    | a   | 9.37 $\pm$ 0.37  |    | a   | 6.48 $\pm$ 0.29 |    | a   | 11.49 $\pm$ 0.37 |    | a   | 29.99 $\pm$ 2.93 |    | a   | 93.95 $\pm$ 7.32  |    | a   | 9.22 $\pm$ 0.64  |    | ab  | 29.70 $\pm$ 1.05 |    | a   | 4.89 $\pm$ 0.77 |    | b   | 368.73 $\pm$ 17.65 |    | a   | 20.98 $\pm$ 1.32 |  | b |
| <i>max4-1</i>                | 1.87 $\pm$ 0.16 |    | a   | 10.02 $\pm$ 1.11 |    | a   | 6.66 $\pm$ 0.93 |    | a   | 13.21 $\pm$ 1.30 |    | ab  | 29.81 $\pm$ 3.08 |    | a   | 100.79 $\pm$ 5.77 |    | a   | 6.81 $\pm$ 4.59  |    | a   | 30.18 $\pm$ 2.52 |    | a   | 3.09 $\pm$ 0.30 |    | a   | 356.43 $\pm$ 20.09 |    | a   | 37.46 $\pm$ 1.83 |  | a |
| <i>tbl29 max4-1</i>          | 1.73 $\pm$ 0.06 |    | a   | 10.09 $\pm$ 0.28 |    | a   | 7.05 $\pm$ 0.20 |    | a   | 12.54 $\pm$ 0.33 |    | a   | 25.24 $\pm$ 2.72 |    | a   | 98.79 $\pm$ 6.13  |    | a   | 9.63 $\pm$ 0.31  |    | ab  | 31.26 $\pm$ 0.62 |    | a   | 3.97 $\pm$ 0.36 |    | ab  | 349.05 $\pm$ 9.29  |    | a   | 21.65 $\pm$ 0.16 |  | b |
