# Supplementary material for: Growth‐ and stress‐related defects associated with wall hypoacetylation are strigolactone‐dependent
Source: PubMed Central journal article supplement (PMC6508513; doi:10.1002/pld3.62), 2018-06-13
Supplement: PLD3-2-e00062-s003.pdf [file PLD3-2-e00062-s003.pdf]

**Supp. Figure 3.** Monosaccharide composition, cellulose and acetate content of stem cell walls in control and GR24-treated plants growing in hydroponic culture . Data are represented as mean (AVG)  $\pm$  the standard deviation (SD) of biological replicates ( $\geq 5$ ). Means with different letters are significantly different (Tukey's HSD,  $p < 0.05$ ) in the significance (Sig) column. Fuc=Fucose; Rha=Rhamnose; Ara=Arabinose; Gal=Galactose; Glc=Glucose; Xyl=Xylose; Man=Mannose; GalA; Galacturonic Acid; GlcA= Glucuronic Acid

|                      | Fuc             |    |     | Rha              |    |     | Ara              |    |     | Gal              |    |     | Glc              |    |     | Xyl               |    |     | Man              |    |     | GalA            |    |     | GlcA            |    |     | Cellulose          |    |     | Acetate          |    |     |
|----------------------|-----------------|----|-----|------------------|----|-----|------------------|----|-----|------------------|----|-----|------------------|----|-----|-------------------|----|-----|------------------|----|-----|-----------------|----|-----|-----------------|----|-----|--------------------|----|-----|------------------|----|-----|
|                      | AVG             | SD | Sig | AVG              | SD | Sig | AVG              | SD | Sig | AVG              | SD | Sig | AVG              | SD | Sig | AVG               | SD | Sig | AVG              | SD | Sig | AVG             | SD | Sig | AVG             | SD | Sig | AVG                | SD | Sig | AVG              | SD | Sig |
| Col-0 Control        | 1.73 $\pm$ 0.11 |    | ab  | 9.52 $\pm$ 0.34  |    | ac  | 8.74 $\pm$ 0.64  |    | a   | 16.24 $\pm$ 0.80 |    | ab  | 9.48 $\pm$ 1.04  |    | a   | 91.39 $\pm$ 1.97  |    | a   | 9.49 $\pm$ 1.00  |    | a   | 2.91 $\pm$ 0.18 |    | ab  | 3.84 $\pm$ 0.34 |    | a   | 367.52 $\pm$ 9.80  |    | a   | 36.44 $\pm$ 4.16 |    | a   |
| Col-0 GR24           | 1.51 $\pm$ 0.12 |    | a   | 9.17 $\pm$ 0.48  |    | a   | 7.60 $\pm$ 0.21  |    | a   | 14.50 $\pm$ 0.29 |    | ac  | 10.73 $\pm$ 0.66 |    | a   | 93.77 $\pm$ 0.57  |    | a   | 10.98 $\pm$ 0.51 |    | ab  | 2.70 $\pm$ 0.13 |    | a   | 3.92 $\pm$ 0.30 |    | ab  | 344.15 $\pm$ 8.10  |    | a   | 36.66 $\pm$ 5.19 |    | a   |
| tbl29 Control        | 1.83 $\pm$ 0.02 |    | b   | 11.45 $\pm$ 0.27 |    | b   | 11.71 $\pm$ 1.60 |    | bc  | 17.80 $\pm$ 0.43 |    | b   | 12.00 $\pm$ 0.79 |    | ab  | 97.55 $\pm$ 1.19  |    | b   | 11.08 $\pm$ 0.17 |    | ab  | 3.26 $\pm$ 0.01 |    | b   | 5.13 $\pm$ 0.67 |    | b   | 318.26 $\pm$ 13.60 |    | b   | 19.19 $\pm$ 1.00 |    | b   |
| tbl29 GR24           | 1.70 $\pm$ 0.06 |    | ab  | 11.69 $\pm$ 0.28 |    | b   | 14.61 $\pm$ 3.00 |    | c   | 18.31 $\pm$ 0.67 |    | b   | 14.60 $\pm$ 2.07 |    | b   | 105.21 $\pm$ 3.68 |    | c   | 12.55 $\pm$ 0.36 |    | b   | 3.16 $\pm$ 0.12 |    | b   | 5.24 $\pm$ 0.89 |    | b   | 309.49 $\pm$ 9.98  |    | b   | 18.89 $\pm$ 1.20 |    | b   |
| tbl29 max4-7 Control | 1.98 $\pm$ 0.08 |    | b   | 10.57 $\pm$ 0.42 |    | bc  | 9.20 $\pm$ 0.76  |    | a   | 16.28 $\pm$ 0.99 |    | ab  | 11.11 $\pm$ 0.58 |    | ab  | 86.24 $\pm$ 3.52  |    | a   | 9.72 $\pm$ 0.47  |    | a   | 3.12 $\pm$ 0.08 |    | b   | 3.79 $\pm$ 0.44 |    | ab  | 356.44 $\pm$ 6.01  |    | a   | 18.38 $\pm$ 1.15 |    | b   |
| tbl29 max4-7 GR24    | 1.48 $\pm$ 0.06 |    | a   | 9.02 $\pm$ 0.31  |    | a   | 10.86 $\pm$ 0.47 |    | ab  | 13.65 $\pm$ 0.80 |    | c   | 11.35 $\pm$ 1.57 |    | ab  | 97.50 $\pm$ 1.01  |    | b   | 9.71 $\pm$ 0.17  |    | a   | 2.61 $\pm$ 0.17 |    | a   | 4.86 $\pm$ 0.44 |    | b   | 329.49 $\pm$ 7.42  |    | b   | 18.88 $\pm$ 0.76 |    | b   |
