# Supplementary material for: Growth‐ and stress‐related defects associated with wall hypoacetylation are strigolactone‐dependent
Source: PubMed Central journal article supplement (PMC6508513; doi:10.1002/pld3.62), 2018-06-13
Supplement: PLD3-2-e00062-s004.pdf [file PLD3-2-e00062-s004.pdf]

|                        | <b>LP</b>                 | <b>RP</b>                | <b>LB</b>               |
|------------------------|---------------------------|--------------------------|-------------------------|
| <i>tbl29-1</i>         | AATTTGCAAGCAAAGCATCAC     | TGGGTTTTTGATAACGAGACG    | GCCTTTTCAGAAATGGATAAATA |
| <i>max4-7 (tbl29S)</i> | GTATGAGAAACTTCTTGTGCGAGGA | GCGAGAGAGAGAAACTGACATTAT | CCGCAATGAGTTGGCTATTCTC  |
| <i>max4-1</i>          | TCTTGTGCCCTCTTCCAATAC     | GTCGAAGAAGAGATGCCGAAAT   | TTGTCTCGATGTAGTGGTTGAC  |
